# Supplementary material for: GLP-1-directed NMDA receptor antagonism for obesity treatment
Source: PubMed Central journal article supplement (PMC11136670; doi:10.1038/s41586-024-07419-8), 2024-05-15
Supplement: 41586_2024_7419_MOESM1_ESM.pdf [file 41586_2024_7419_MOESM1_ESM.pdf]

**Supplementary information**

---

**GLP-1-directed NMDA receptor antagonism  
for obesity treatment**

---

In the format provided by the  
authors and unedited

**Supplementary information**

---

**GLP-1-directed NMDA receptor antagonism  
for obesity treatment**

---

In the format provided by the  
authors and unedited

## Chemical structures

### GLP-1 analogue. C-terminal cysteine homolog.

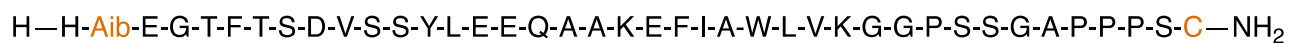

### GLP-1 analogue. C-terminal homocysteine homolog.

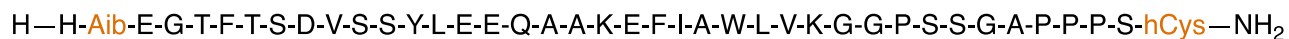

### GLP-1 analogue. C-terminal penicillamine homolog.

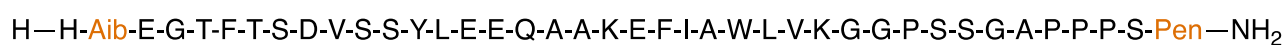

### GLP-1–MK-801 (Cys-linked).

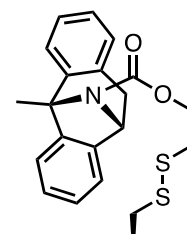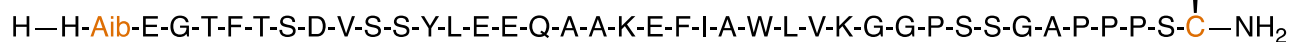

### GLP-1–MK-801 (hCys-linked).

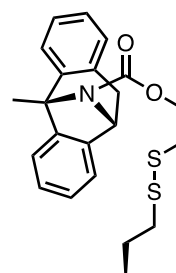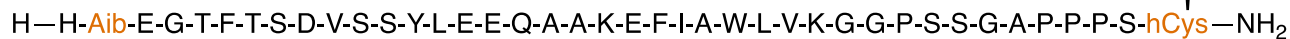

### GLP-1–MK-801 (Pen-linked).

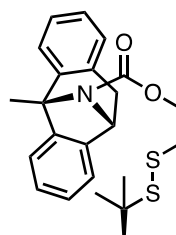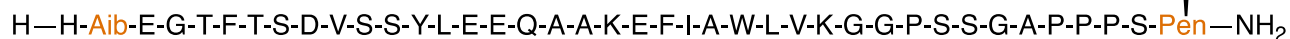

**GLP-1–inactive MK-801.**

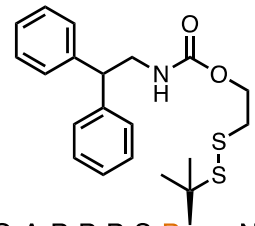

H–H–Aib–E–G–T–F–T–S–D–V–S–S–Y–L–E–E–Q–A–A–K–E–F–I–A–W–L–V–K–G–G–P–S–S–G–A–P–P–P–S–Pen–NH<sub>2</sub>

**GIP analogue.**

H–Y–Aib–E–G–T–F–I–S–D–Y–S–I–A–M–D–K–I–H–Q–Q–D–F–V–N–W–L–L–A–Q–G–P–S–S–G–A–P–P–P–S–Pen–NH<sub>2</sub>

**GIP–MK-801.**

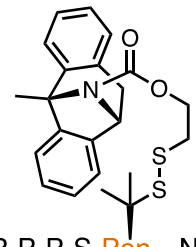

H–Y–Aib–E–G–T–F–I–S–D–Y–S–I–A–M–D–K–I–H–Q–Q–D–F–V–N–W–L–L–A–Q–G–P–S–S–G–A–P–P–P–S–Pen–NH<sub>2</sub>

**GIP/GLP-1 analogue.**

H–Y–Aib–E–G–T–F–T–S–D–Y–S–I–Y–L–D–K–Q–A–A–Aib–E–F–V–N–W–L–L–A–G–G–P–S–S–G–A–P–P–P–S–Pen–NH<sub>2</sub>

**GIP/GLP-1–MK-801.**

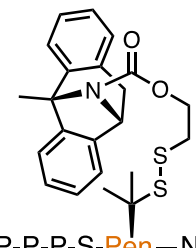

H–Y–Aib–E–G–T–F–T–S–D–Y–S–I–Y–L–D–K–Q–A–A–Aib–E–F–V–N–W–L–L–A–G–G–P–S–S–G–A–P–P–P–S–Pen–NH<sub>2</sub>

**PYY-analogue.**

H–I–K–P–E–A–P–G–Pen–D–A–S–E–E–L–N–R–Y–Y–A–S–L–R–H–Y–L–N–W–V–T–R–Q–β-homoArg–Y–OH

**PYY–MK-801.**

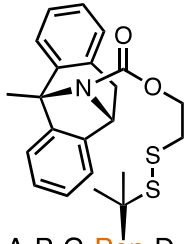

H-I-K-P-E-A-P-G-Pen-D-A-S-E-E-L-N-R-Y-Y-A-S-L-R-H-Y-L-N-W-V-T-R-Q-β-homoArg-Y-OH

**Supplementary Fig. 1 | Structures of chemical compounds.** Chemical structures of GLP-1, GIP, GIP/GLP-1 and PYY analogues, and GLP-1–MK-801, GIP–MK-801, GIP/GLP-1–MK-801 and PYY–MK-801 conjugates.
